# Supplementary material
Source: publisher site journal article supplement (https://www.dovepress.com/article/393195)
Supplement: Supplementary file 1 [file get_supplementary_file.php]

**Materials and Methods**

**Sample and Information Collection**

This was a retrospective study involving 6 patients with *chlamydia psittaci* pneumonia diagnosed using mNGS at the second people's Hospital of Kunming, China, from 1 November 2020 to 30 November 2021. Clinical data of the patients, including demographic data, clinical manifestations, laboratory examination findings, imaging features, treatment approaches and outcomes, were collected from the electronic medical records and analysed. The bronchoalveolar lavage fluid samples were collected from the enrolled patients. The remaining samples were stored at −80°C for subsequent DNA sequencing of major outer membrane protein (MOMP) gene (*ompA*). To determine the genotype of *C. psittaci*, phylogenetic analysis was performed based on the 1460 bp OmpA gene fragments obtained. The Representative sequences of C. psittaci involving genotypes A, B, C, D, E, E/B, F,WC, M56, and GPIC were downloaded from the GenBank database. Then, a dataset for the analysis of the OmpA gene was composed of the reference sequences and the resulting sequences.

**mNGS assay**

All bronchoalveolar lavage fluid (BALF) was send to a commercial laboratory (in Hangzhou Matridx Biotechnology Co., Ltd.) for mNGS testing. The samples were put into the Wall Breaker (MDL-QT-YQ032, Hangzhou Matridx Biotechnology Co., Ltd, Hangzhou, China) to destroy the walls of the microorganism. DNA isolation and subsequent NGS library preparation were performed using a NGS workstation, NGS master ( Hangzhou Matridx Biotechnology Co., Ltd, Hangzhou, China). Concentration of libraries was quantified by real-time PCR (KAPA) and pooled. Shotgun sequencing was carried out on NextSeq 550DX instrument (Illumina, San Diego, CA). Approximately 20 million of 50 bp single-end reads were generated for each library. Filtered sequencing reads were aligned to the human reference genome (GRCh38.p13 version 32 release; GENCODE). The remaining reads were then aligned with the current bacterial, virus, fungal and parasite databases (NCBI; http://ftp.ncbi.nlm.nih.gov/genomes). Negative control (a medium containing 10^6 Jurkat cells/mL) was added at each run.

**PCR and Evolutionary tree construction**

We extracted psittacosis strains of each genotype from the genebank. After mNGS, case 3, 4, and 5 had remaining nucleic acids, which were used for PCR amplification. The ompA was amplified using gene-specific primers [1, 2]. Strain information and primers are shown in the table below. Depending on the different strains, amplification yielded fragments of 1065 to 1098 bp. Amplified PCR products were electrophoresed in 1.2% agarose gels. PCR products were purified with an Agarose Gel DNA Extraction Kit (magnetic beads purification) (Sangon Biotech Co., Ltd., Shanghai, China) and further sequenced by Sanger sequencing. Nucleotide Sequence editing and alignment were conducted using the software package DNASTAR (lasergene) (version 8, DNASTAR[3]). The sequencing results were aligned with the sequences obtained from the genbank database to identify known sequences with a high degree of similarity using ClustalW (https://www.genome.jp/tools-bin/ClustalW) .With 1000 bootstrap replicates and a transition-transversion ratio of 2.0 in MEGA11, a phylogenetic tree was constructed using the neighbor-joining method with the Kimura 2-parameter model [4].

| Type | strain | genebankID# | length |
| --- | --- | --- | --- |
| A | 6BC | M73035.1 | 1287bp |
| A | 90/1051 | AY762608.1 | 1098 bp |
| A | GD19A2 | MT386538.1 | 1209 bp |
| B | 41A12 | AY762609.1 | 1098bp |
| C | GD | AF269261.1 | 1421bp |
| D | NJ1 | AF269266.1 | 1430bp |
| E | 3759/2 | AY762611.1 | 1098bp |
| F | VS225 | AF269259.1 | 1425bp |
| E/B | WS/RT/E30 | AY762613.1 | 1098bp |
| WC | WC | AF269269.1 | 1434bp |
| M56 | M56 | AF269268.1 | 1448bp |
| primers | | | |
| F: | 5'-ATGAAAAAACTCTTGAAATCGG-3' | | |
| R: | 5’-CAAGATTTTCTAGA(T/C)TTCAT(C/T)TTGTT-3' | | |

**References**

1. Andersen, A.A., *Serotyping of Chlamydia psittaci isolates using serovar-specific monoclonal antibodies with the microimmunofluorescence test.* J Clin Microbiol, 1991. **29**(4): p. 707-11.

2. Song, L., et al., *Genotyping of Chlamydophila psittaci strains derived from avian and mammalian species.* Vet Res Commun, 2009. **33**(6): p. 577-80.

3. Burland, T.G., *DNASTAR's Lasergene sequence analysis software.* Methods Mol Biol, 2000. **132**: p. 71-91.

4. Tamura, K., G. Stecher, and S. Kumar, *MEGA11: Molecular Evolutionary Genetics Analysis Version 11.* Mol Biol Evol, 2021. **38**(7): p. 3022-3027.
